# Supplementary material for: The molecular mechanism of Y473 phosphorylation of UGDH relieves the inhibition effect of UDP-glucose on HuR
Source: Royal Society of Chemistry journal article supplement (doi:10.1039/d3cp00227f), 2023-01-01
Supplement: d3cp00227f1.pdf [file d3cp00227f1.pdf]

## Supplementary materials

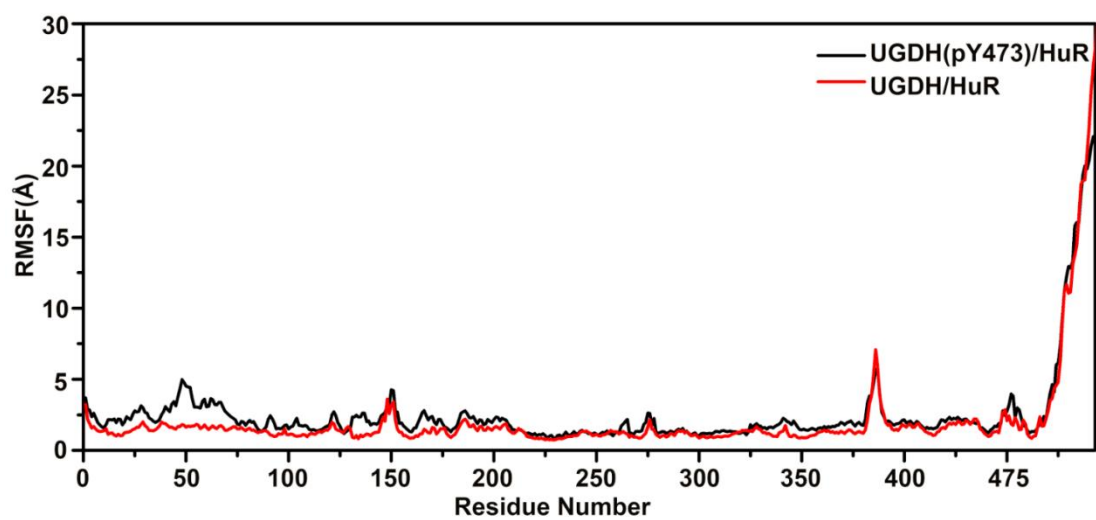

Figure S1. Comparison of the root mean square fluctuation (RMSF) of UGDH in wild type and Y473 phosphorylated UGDH/HuR complex

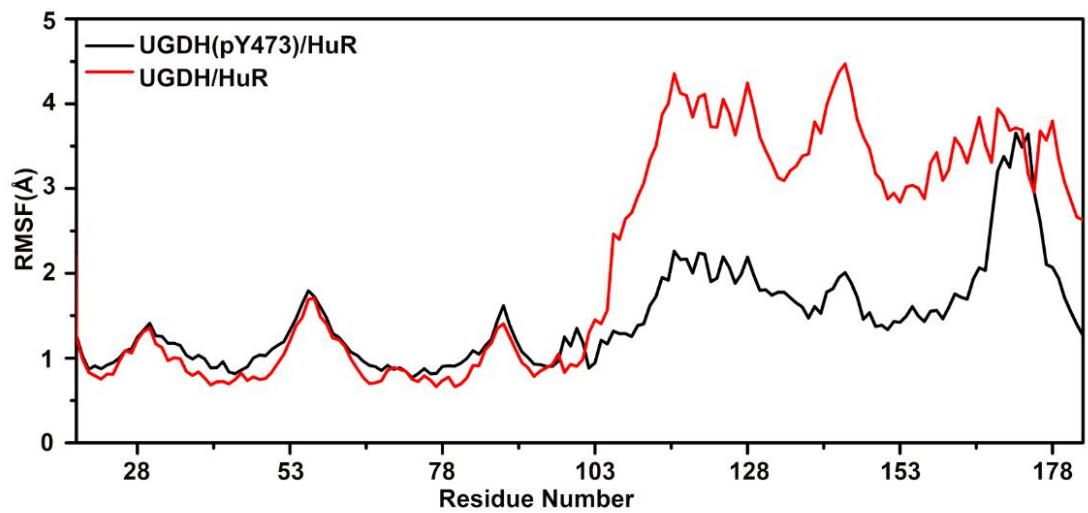

Figure S2. Comparison of the root mean square fluctuation (RMSF) of HuR in wild type and Y473 phosphorylated UGDH/HuR complex

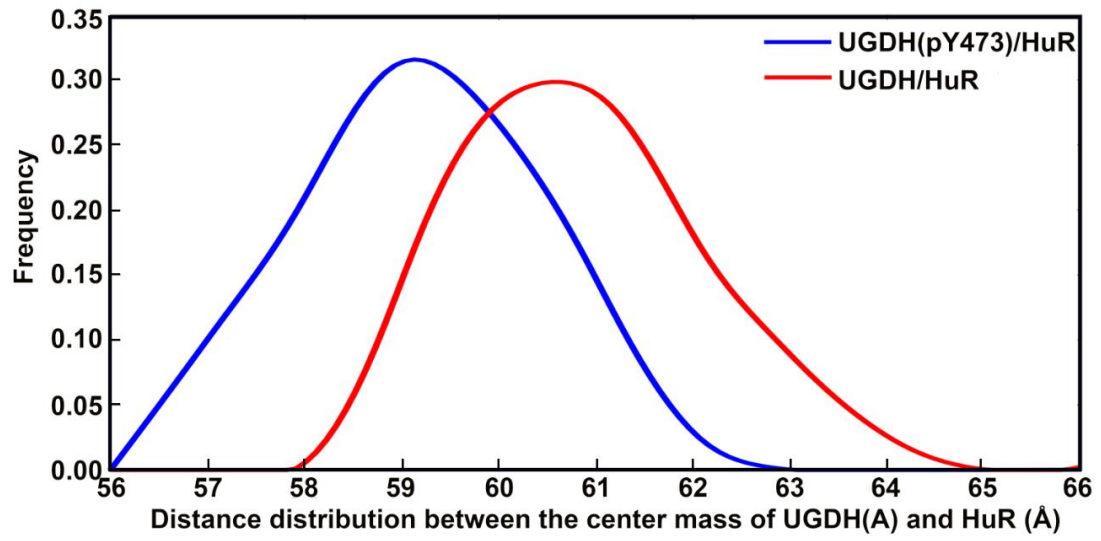

Figure S3. Comparison of the distance between UGDH and HuR in wild type and Y473 phosphorylated UGDH/HuR complex.

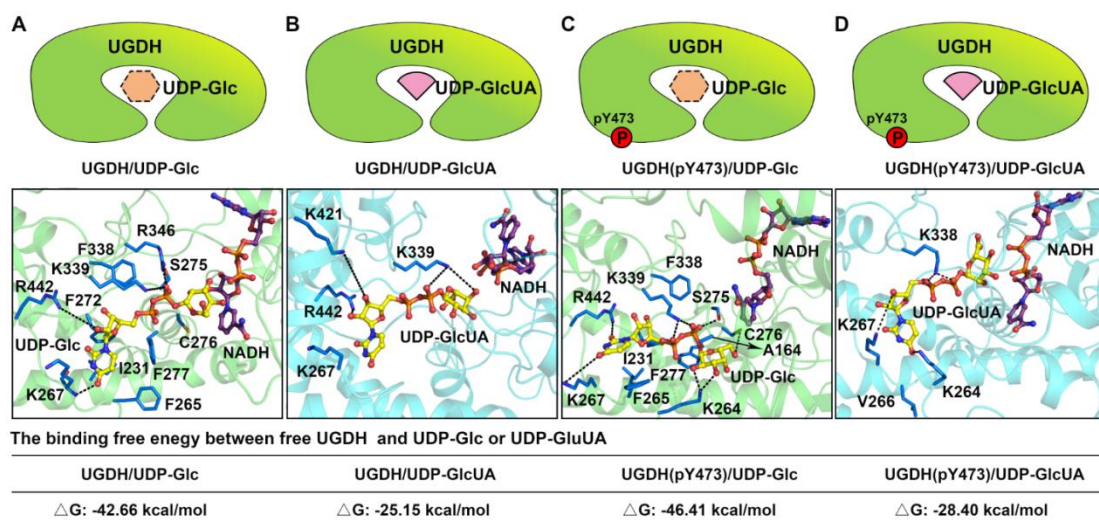

Figure S4. The binding modes of UDP-Glc with UGDH (A), UDP-GlcUA with UGDH (B), UDP-Glc with Y473 phosphorylated UGDH (C) and UDP-GlcUA with Y473 phosphorylated UGDH (D). Schematic of each binding model was showed on the upper. The wide type and Y473 phosphorylated UGDH were shown as green and cyan cartoon respectively. The dominant residues and two ligands were shown in sticks. UDP-Glc and UDP-GlcUA were coloured in cyan and pink, respectively. The color of dominant residues in the two complexes were consistent with the color of cartoon. The numbers represent the binding free energy (kcal/mol) between molecules.

Table S1 The binding free energy between UGDH hexamer and HuR (kcal/mol).

|       | Monomer/HuR |       | Trimer/HuR |       | Hexamer/HuR |       | Hexamer(pY473)/HuR |       |
|-------|-------------|-------|------------|-------|-------------|-------|--------------------|-------|
|       | Total       | STD   | Total      | STD   | Total       | STD   | Total              | STD   |
| Pose1 | -62.46      | 12.50 | -66.32     | 15.21 | -75.10      | 11.85 | -83.39             | 13.05 |
| Pose2 | -62.43      | 14.26 | -70.09     | 5.76  | -85.38      | 10.45 | -119.10            | 12.75 |
| Pose3 | -64.02      | 12.01 | -45.05     | 13.34 | -79.80      | 11.07 | -115.42            | 13.54 |
| Pose4 |             |       |            |       | -70.96      | 11.80 | -89.04             | 11.17 |
| Pose5 |             |       |            |       | -64.04      | 12.88 | -83.35             | 10.03 |
| Pose6 |             |       |            |       | -67.71      | 11.28 | -64.04             | 12.23 |

Table S2 Dominant residues in binding free energy contribution between UGDH and HuR (kcal/mol).

| UGDH/HuR     |       |      | UGDH(pY473)/HuR |        |      |
|--------------|-------|------|-----------------|--------|------|
| Residue      | Total | STD  | Residue         | Total  | STD  |
| HuR:R37      | -3.99 | 0.25 | HuR:R19         | -12.00 | 1.69 |
| HuR:S42      | -3.17 | 0.44 | HuR:R147        | -8.57  | 1.46 |
| HuR:I103     | -3.14 | 0.32 | HuR:R76         | -5.61  | 0.87 |
| UGDH(A):R470 | -3.00 | 0.14 | HuR:S42         | -4.95  | 0.67 |
| UGDH(D):E200 | -2.85 | 0.35 | UGDH(A):D418    | -4.94  | 0.76 |
| HuR:R115     | -2.75 | 0.16 | UGDH(D):P186    | -4.16  | 0.45 |
| UGDH(D):P186 | -2.73 | 0.31 | UGDH(D):R205    | -3.64  | 0.51 |
| UGDH(D):Q193 | -2.59 | 0.21 | UGDH(A):R427    | -3.51  | 0.39 |
| HuR:R147     | -2.46 | 0.24 | HuR:R136        | -3.30  | 0.24 |
| HuR:L39      | -2.34 | 0.27 | HuR:I103        | -3.26  | 0.32 |
| HuR:F182     | -2.31 | 0.41 | UGDH(A):E250    | -3.16  | 0.25 |
| UGDH(A):P471 | -2.30 | 0.33 | UGDH(A):M419    | -3.09  | 0.34 |
| UGDH(A):L448 | -2.22 | 0.47 | HuR:F183        | -3.03  | 0.33 |
| HuR:R76      | -2.14 | 0.11 | HuR:R153        | -2.93  | 0.19 |
|              |       |      | HuR:R85         | -2.88  | 0.24 |
|              |       |      | HuR:L84         | -2.83  | 0.22 |
|              |       |      | HuR:R115        | -2.37  | 0.45 |
|              |       |      | HuR:K72         | -2.31  | 0.35 |
|              |       |      | UGDH(D):Q189    | -2.23  | 0.24 |
|              |       |      | HuR:L39         | -2.18  | 0.13 |
|              |       |      | UGDH(D):Q193    | -2.13  | 0.17 |
|              |       |      | HuR:T80         | -2.12  | 0.22 |

Table S3 Hydrogen bond occupancies between UGDH(Hexamers) and HuR during MD simulations.

| Hydrogen Bonds   |                 |                 |           |
|------------------|-----------------|-----------------|-----------|
| Acceptor         | DonorH          | Donor           | Occupancy |
| UGDH(A):V494@OXT | HuR:R115@HH12   | HuR:R115@NH1    | 83.45%    |
| UGDH(A):V494@O   | HuR:R115@HH22   | HuR:R115@NH2    | 79.27%    |
| UGDH(A):E478@OE1 | HuR:R115@HH12   | HuR:R115@NH2    | 74.53%    |
| UGDH(A):E451@OE1 | HuR:R136@HH12   | HuR:R136@NH1    | 74.00%    |
| UGDH(A):D446@OE1 | HuR:Q141@HE22   | HuR:Q141@NE22   | 72.21%    |
| UGDH(A):E478@OE1 | HuR:R115@HH12   | HuR:R115@NH1    | 69.68%    |
| UGDH(A):V494@OXT | HuR:R147@HH11   | HuR:R147@NH1    | 49.54%    |
| HuR:E47@OE2      | UGDH(D):S476@HG | UGDH(D):S476@OG | 50.91%    |
| UGDH(A):Q453@OE1 | HuR:Y26@H       | HuR:Y26@N       | 50.00%    |
| UGDH(A):V466@O   | HuR:Q87@HE21    | HuR:Q87@NE2     | 47.47%    |
| UGDH(A):T454@OG1 | HuR:Q29@HE22    | HuR:Q29@NE2     | 43.64%    |
| UGDH(A):Q453@OE1 | HuR:N25@HD22    | HuR:N25@ND2     | 38.55%    |
| HuR:E47@OE1      | UGDH(D):S476@HG | UGDH(D):S476@OG | 36.36%    |
| HuR:E47@OE2      | UGDH(D):S476@H  | UGDH(D):S476@N  | 35.82%    |
| UGDH(A):E451@OE1 | HuR:R136@HH22   | HuR:R136@NH2    | 33.27%    |
| UGDH(A):E451@OE2 | HuR:R136@HH22   | HuR:R136@NH2    | 31.64%    |
| UGDH(A):V466@O   | HuR:S88@HG      | HuR:S88@OG      | 30.18%    |
| UGDH(A):E451@OE2 | HuR:D105@HD21   | HuR:D105@ND2    | 28.18%    |
| UGDH(A):Q458@OE1 | HuR:Q29@HE22    | HuR:Q29@NE2     | 28.02%    |
| UGDH(A):G477@O   | HuR:G112@H      | HuR:G112@N      | 26.95%    |
| HuR:E47@OE2      | UGDH(D):S476@H  | UGDH(D):S476@N  | 26.00%    |
| HuR:Q29@OE1      | UGDH(D):S468@HG | UGDH(D):S468@OG | 25.09%    |
